# Supplementary material for: Serum Interleukin-8 Reflects Tumor Burden and Treatment Response across Malignancies of Multiple Tissue Origins
Source: Oxford University Press journal article supplement (doi:10.1158/1078-0432.ccr-13-3203), 2014-09-16
Supplement: 10780432ccr133203-sup-123227_3_supp_2621587_nym9dk.doc [file 10780432ccr133203-sup-123227_3_supp_2621587_nym9dk.doc]

Supplementary Table 1. Baseline clinical features of patients.

| MELANOMA | | | |
| --- | --- | --- | --- |
|  | **Ipilimumab**  **(n=8)** | **iBraf**  **(n=16)** | |
| Age | | | |
| Median (y) | 63 | 52 | |
| Range | 47 – 83 | 34 – 82 | |
| Gender-no. (%) | | | |
| Male | 3 (37.5) | 11 (68.75) | |
| Female | 5 (62.5) | 5 (31.25) | |
| Stage-no. (%) | | | |
| IIIC | 0 | | 1 (6.2) |
| M1a | 0 | 5 (31.2) | |
| M1b | 0 | 1 (6.2) | |
| M1c | 8 (100) | 9 (56.2) | |
| LDH-no. (%) | | | |
| >ULN | 5 (62.5) | 5 (31.2) | |
| Treatment |  |  | |
| Ipilimumab1 | 8 (100) | 0 | |
| Vemurafenib2 | 0 | 12 (75) | |
| Dabrafenib3 | 0 | 4 (25) | |
| Follow up | | | |
| Median (m) | 5 | 14 | |
| RCC (n=23) | | | |
| Age | | | |
| Median | 57 | | |
| Range | 37-77 | | |
| Gender-no. (%) | | | |
| Male | 16 (70) | | |
| Female | 7 (30) | | |
| Stage-no. (%) |  | | |
| IV | 23 (100) | | |
| Treatment-no. (%) | | | |
| Sunitinib4 | 23 (100) | | |
| Follow up | | | |
| Median (m) | 25 | | |

| HCC (n=33) | | |
| --- | --- | --- |
| Age | | |
| Median | | 65 |
| Range | | 45-77 |
| Gender-no. (%) | | |
| Male | | 29 (88) |
| Female | | 4 (12) |
| Stage-no. (%) | | |
| BCLA | 11 (33) | |
| BCLB | 11 (33) | |
| BCLC | 11 (33) | |
| Follow-up |  | |
| Median (m) | 18.5 | |
| NSCLC (n=21) | | |
| Age | | |
| Median | | 58 |
| Range | | 34-79 |
| Gender-no. (%) | | |
| Male | | 10 (48) |
| Female | | 11 (52) |
| Stage-no. (%) | | |
| I-II | 8 (38) | |
| III | 6 (29) | |
| IV | 7 (33) | |

| Serum and Urine IL-8 group (n=18) | | | |
| --- | --- | --- | --- |
| Age | | | |
| Median | | 62 | |
| Range | | 25-78 | |
| Gender-no. (%) | | | |
| Male | | 15 (83) | |
| Female | | 3 (17) | |
| Tumor type-no (%) | | | |
| NSCLC | 3 (16.7) | | |
| Melanoma | 3 (16.7) | | |
| Prostate Carcinoma5 | | | 6 (33.3) |
| Bladder Carcinoma | 3 (16.7) | | |
| Others6 | 3 (16.7) | | |

1, Ipilimumab 3 or 10 mg/kg intravenously every 3 weeks (4 doses); 2, Vemurafenib 960 mg orally b.i.d; 3, Dabrafenib 150mg orally b.i.d; 4, Sunitinib 50 mg once daily for 4 weeks, followed by 2 weeks without treatment.

5 Prostate cancer with prostatectomy 3 (17%) and without prostatectomy 3 (17%).

6 Cholangiocarcinoma, vulvar cancer and renal cell carcinoma. RCC, renal cell carcinoma; HCC, hepatocellular carcinoma; NSCLC, non-small cell lung cancer.
