# Supplementary material for: Serum Interleukin-8 Reflects Tumor Burden and Treatment Response across Malignancies of Multiple Tissue Origins
Source: Oxford University Press journal article supplement (doi:10.1158/1078-0432.ccr-13-3203), 2014-09-16
Supplement: 10780432ccr133203-sup-123227_3_supp_2621588_nrm9dk.doc [file 10780432ccr133203-sup-123227_3_supp_2621588_nrm9dk.doc]

Supplementary Table 2. Clinical features of patients treated with (curative or debulking) surgery (n=7).

|  | **Age** | **Gender** | **Primary** | **Stage** | **Surgery** | **TB Removed**  **(Σ longest diameters)** | **IL-8 (pg/ml)** | |
| --- | --- | --- | --- | --- | --- | --- | --- | --- |
| **Pre-surgery** | **Post-surgery** |
| P1 | 48 | Female | RCC | Metastatic | Partial nephrectomy | 150 mm | 45.7 | 8.5 |
| P2 | 40 | Male | RCC | Localized | Partial nephrectomy | 32 mm | 16.2 | 0 |
| P3 | 50 | Male | RCC | Localized | Partial nephrectomy | 95 mm | 20.8 | 0 |
| P4 | 58 | Male | HCC | BCLC B | Atypical hepatectomy | 60 mm | 400 | 54 |
| P5 | 56 | Female | Pancreatic cancer | Localized | Duodenopancreatectomy | 20 mm | 746 | 127 |
| P6 | 50 | Female | CRC | Metastatic | Partial hepatectomy | 55 mm | 860 | 40.5 |
| P7 | 67 | Male | CRC | Localized | Protocolectomy | 31 mm | 145 | 35 |

RCC, renal cell carcinoma; HCC, hepatocellular carcinoma; CRC, colorectal cancer, TB, tumor burden.
